# Supplementary material for: Regulation of pentose utilisation by AraR, but not XlnR, differs in Aspergillus nidulans and Aspergillus niger
Source: PubMed Central journal article supplement — Appl Microbiol Biotechnol. 2011 Apr 12;91(2):387–97. doi: 10.1007/s00253-011-3242-2 (PMC3125510; doi:10.1007/s00253-011-3242-2), 2011-04-12
Supplement: 253_2011_3242_MOESM1_ESM.pdf [file 253_2011_3242_MOESM1_ESM.pdf]

| <b>Supplemental Table 1. Plasmids and primers used in this study.</b> |                                                                                  |                |
|-----------------------------------------------------------------------|----------------------------------------------------------------------------------|----------------|
| <b>Name</b>                                                           | <b>Description plasmid/5'to 3'sequence primer</b>                                | <b>gene id</b> |
| pUC21                                                                 | Vieira J, Messing J. <i>Gene</i> 1991, 100:189-194.                              |                |
| pCR <sup>®</sup> -Blunt II -TOPO <sup>®</sup>                         | Invitrogen                                                                       |                |
| pCR <sup>®</sup> 4-TOPO <sup>®</sup>                                  | Invitrogen                                                                       |                |
| pAN52-1yes                                                            | TNO, the Netherlands                                                             |                |
| pIC20-arg                                                             | I. Nikolaev, Danisco A/S                                                         |                |
| pExpress1                                                             | I. Nikolaev, Danisco A/S                                                         |                |
| pCDA21                                                                | Chaver Roche MK, Ghigo JM, d'Enfert C. <i>Nucleic Acids Res</i> 2000, 28(22):E97 |                |
| pSFH1                                                                 | 3.8 kb <i>araR</i> fragment in pCR <sup>®</sup> -Blunt II-TOPO <sup>®</sup>      |                |
| pSFH3                                                                 | <i>araR</i> disruption construct                                                 |                |
| pSFH4                                                                 | <i>xlnR</i> disruption construct                                                 |                |
| pExPntR                                                               | 2.5 kb <i>araR</i> fragment in pExpress1                                         |                |
| R1.7 T40                                                              | GCGGGGAGCATAATATATACAGGTCCAGTT                                                   |                |
| R1.7 B3795                                                            | TGAATCTCGTCTTGGAAGGATTCAAGATG                                                    |                |
| R1.7 <i>SpeI</i> T603                                                 | GGACTAGTGCAGGATGATCGCATCGACAATTATATAAG                                           |                |
| R1.7 <i>NdeI</i> B4008                                                | GGAATTCCATATGAAAGTCTGGAAGGAATCAGGGAAGCG                                          |                |
| <i>xlnR</i> T245 <i>XhoI</i>                                          | CCGCTCGAGGCGGTCTGATGACCCTGAGTTGCAAGC                                             |                |
| <i>xlnR</i> B2067 <i>KpnI</i>                                         | CGGGGTACCCGCGGACGGAGGATGGCTTGAAAGTA                                              |                |
| <i>xlnR</i> T3501 <i>BamHI</i>                                        | CGGGATCCTCAGGACGGCGAGCGAGAAAAACGAGG                                              |                |
| <i>xlnR</i> B5510 <i>NotI</i>                                         | ATAAGAATGCGGCCGCAAAGACGCTGCCGCTGCCGTGAAAGCCC                                     |                |
| <i>argB</i> T1 <i>KpnI</i>                                            | GGGGTACCCAGTCTCCCTTCCAGCCAGTCGACGG                                               |                |
| <i>argB</i> B2690 <i>BamHI</i>                                        | CGGGATCCCCGAGCTTGTGATGCCGAGGACTGTTT                                              |                |
| <i>ladA</i> probe dw                                                  | GATGCATTGGTCCCATGATC                                                             | AN0942         |
| <i>ladA</i> probe up                                                  | GACCTTAATGGCTCCTGTCTT                                                            |                |
| <i>larA</i> probe dw                                                  | CTCGGCAAGAAGGTTACGC                                                              | AN7193         |
| <i>larA</i> probe up                                                  | CTTGGGAATGACCGAGTGG                                                              |                |
| <i>lxA</i> probe dw                                                   | CGCTCCCGAACTGAAGAA                                                               | AN10169        |
| <i>lxA</i> probe up                                                   | CGCAACCTCCTCCGTAAAC                                                              |                |
| <i>xdhA</i> probe dw                                                  | TCGTCTCGAAGGCATTC                                                                | AN9064         |
| <i>xdhA</i> probe up                                                  | TTGATCTGCCCAGAAGCC                                                               |                |
| <i>xyrA</i> probe dw                                                  | ACCGTCAAACCTCAACAGCG                                                             | AN0423         |
| <i>xyrA</i> probe up                                                  | CGAACCCAACAACATCCAG                                                              |                |
| <i>xkiA</i> probe dw                                                  | ACTGGTCCTCAGATTCTG                                                               | AN8790         |
| <i>xkiA</i> probe up                                                  | TCTTCTCAATGAACTCCTC                                                              |                |
