# Supplementary material for: Regulation of pentose utilisation by AraR, but not XlnR, differs in Aspergillus nidulans and Aspergillus niger
Source: PubMed Central journal article supplement — Appl Microbiol Biotechnol. 2011 Apr 12;91(2):387–97. doi: 10.1007/s00253-011-3242-2 (PMC3125510; doi:10.1007/s00253-011-3242-2), 2011-04-12

**Supplemental Fig. 1. Schematic cloning strategies and Southern blot analysis of the *A. nidulans*  $\Delta araR$ ,  $\Delta xlnR$  and  $\Delta araR/\Delta xlnR$  strains. A. Strategy and Southern analysis of the *araR* disruptant; B. Strategy and Southern analysis of the *xlnR* disruptant; C. Southern analysis of the  $\Delta araR/\Delta xlnR$  disruptant. Left: *Hind*III digest. Right: *Cla*I digest.**

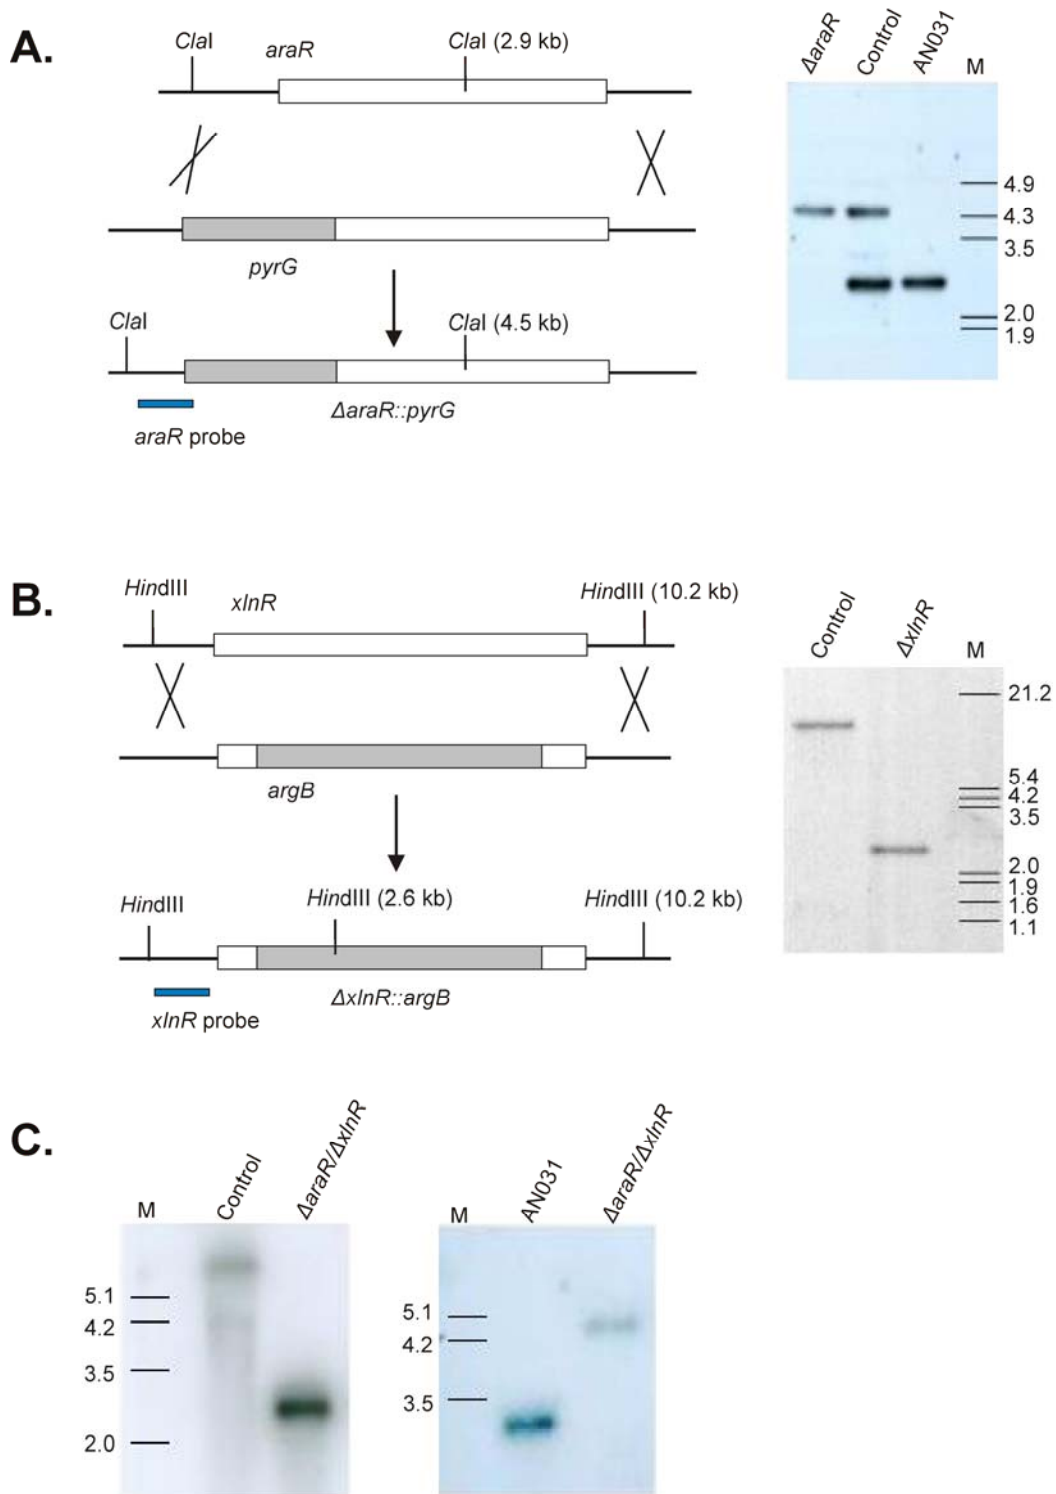

Supplement: 253_2011_3242_MOESM2_ESM.pdf [file 253_2011_3242_MOESM2_ESM.pdf]
